# Supplementary material
Source: MDPI journal article supplement (https://www.mdpi.com/2073-4395/11/1/30)
Supplement: s1 [file s1]

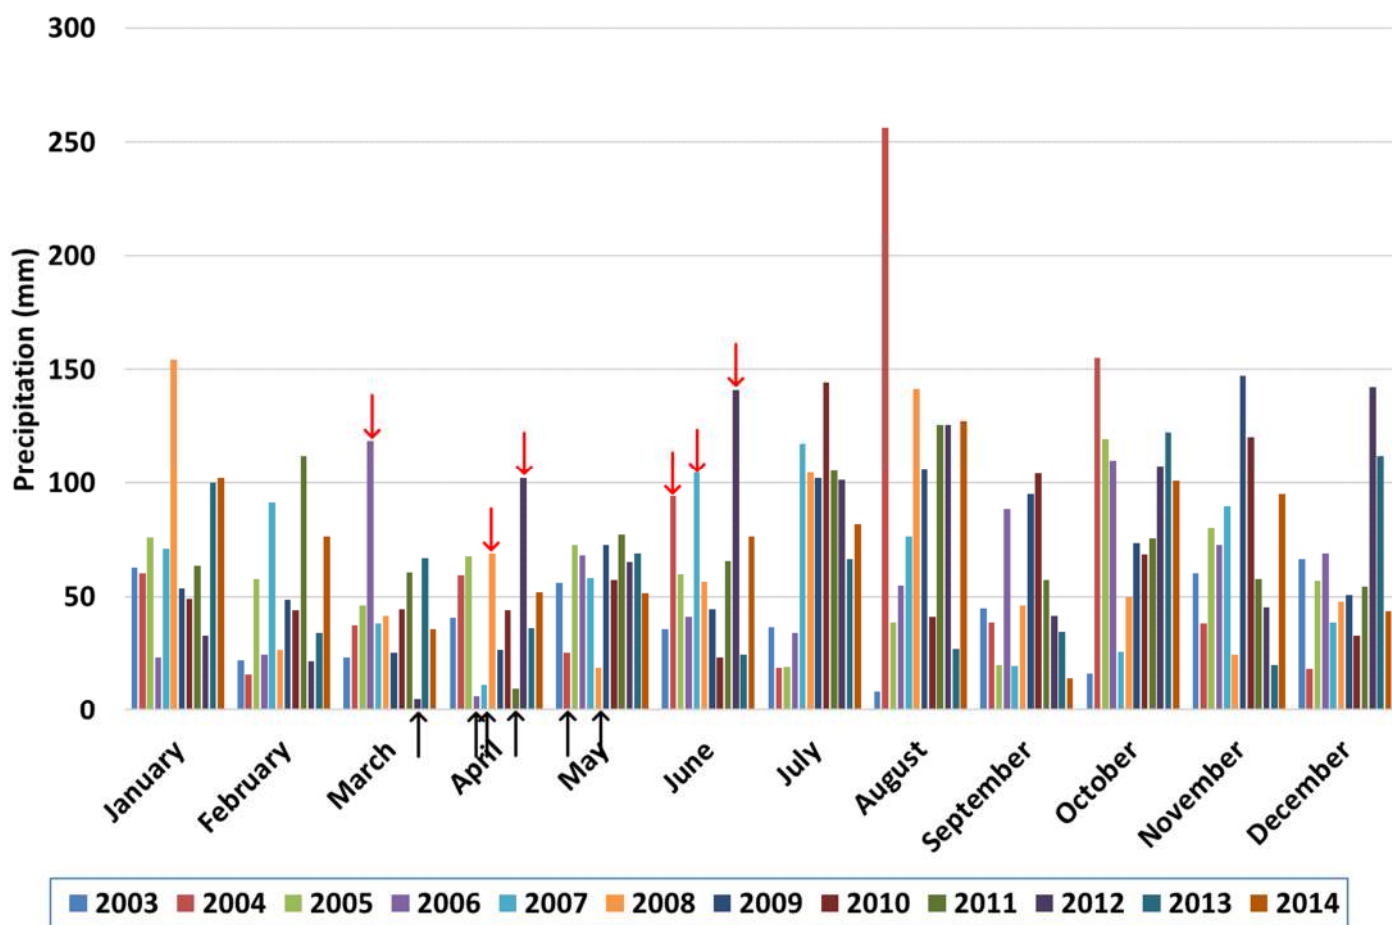

**Figure S1.** Mean monthly precipitation for Mid Pilmore from 2003 to 2014. Red and black arrows indicate notable high or low rainfall month-years respectively.

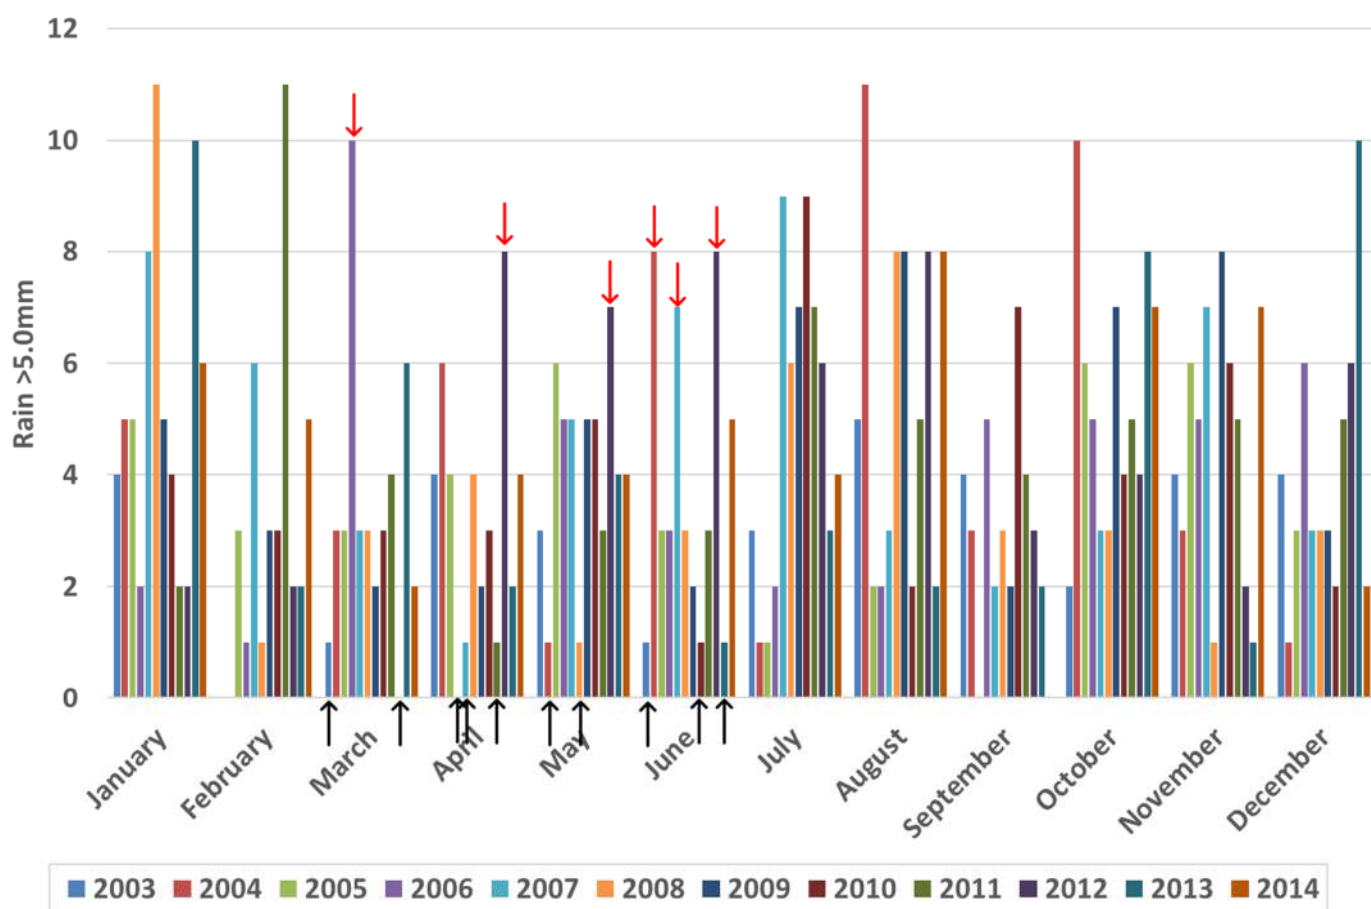

**Figure S2.** Mean monthly days with rain >5.0mm for Mid Pilmore from 2003 to 2014. Red and black arrows indicate notable high or low rain >5.0mm days month-years respectively.

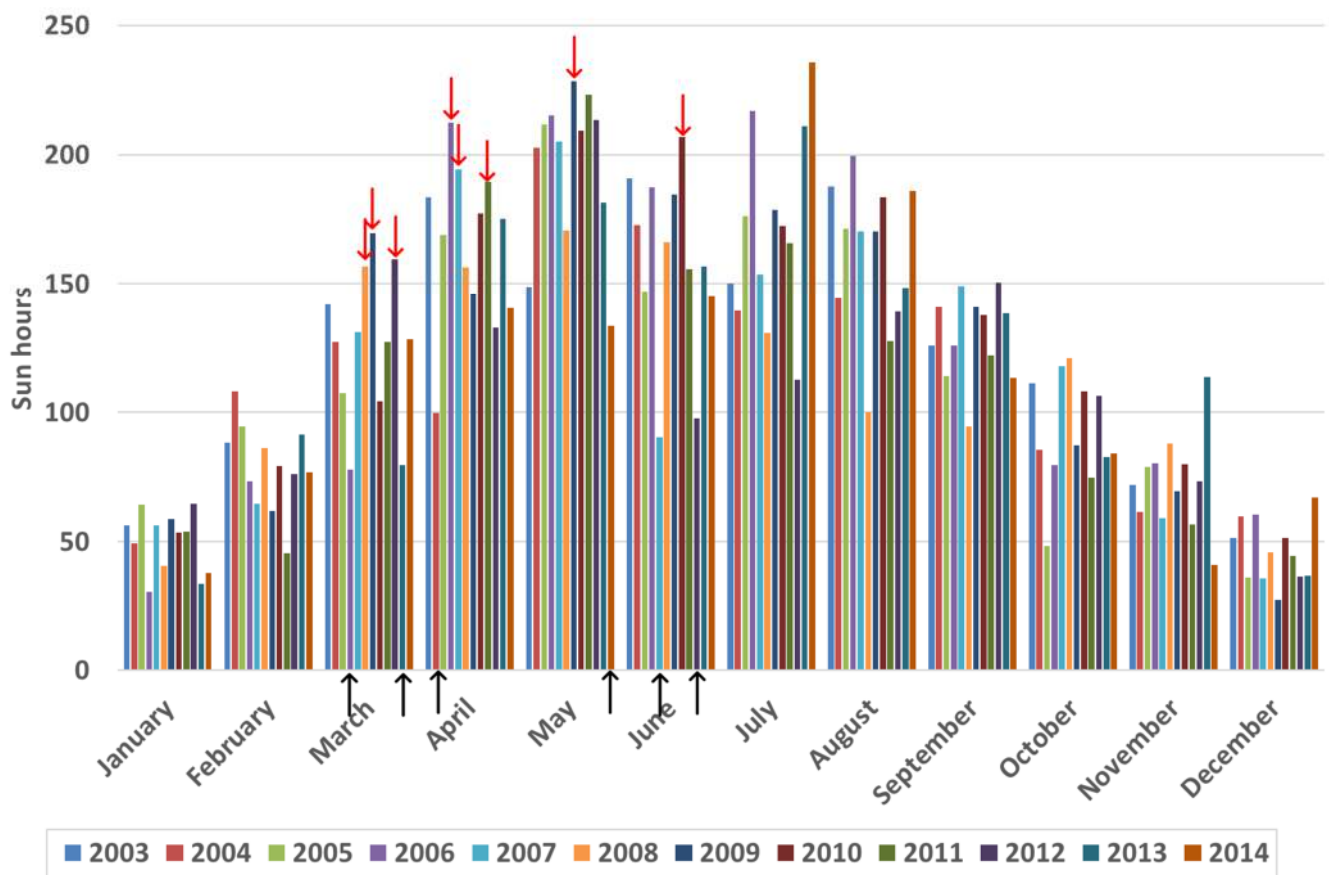

**Figure S3.** Mean monthly sunshine hours for Mid Pilmore from 2003 to 2014. Red and black arrows indicate notable high or low sunshine hour month-years respectively.

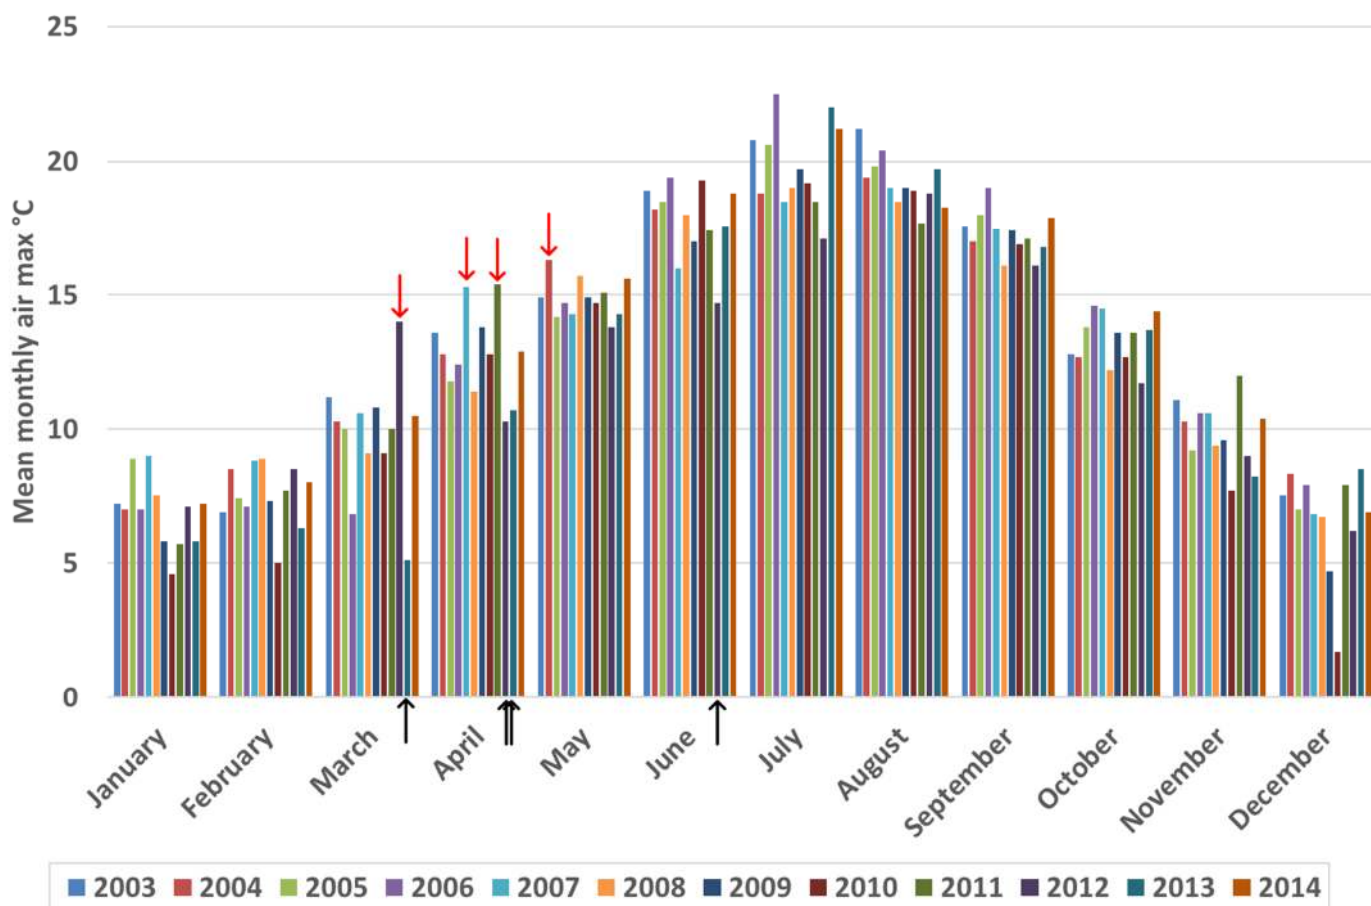

**Figure S4.** Mean monthly air temperature maximum for Mid Pilmore from 2003 to 2014. Red and black arrows indicate notable high or low maximum value month-years respectively.
